1 **Individual differences in fear learning: Specificity to trait-anxiety beyond other measures of**  
2 **negative affect, and mediation via amygdala activation**

3 **Running title: trait-anxiety predicts danger and safety learning**

4 Rachel Sjouwerman, MSc<sup>1</sup>, Robert Scharfenort, PhD<sup>1</sup>, & Tina B. Lonsdorf, PhD<sup>1</sup>

5 <sup>1</sup> University Medical Center Hamburg-Eppendorf, Department of Systems Neuroscience, Hamburg,  
6 Germany.

7 Correspondence should be addressed to:

8 Dr. Tina B. Lonsdorf  
9 Department of Systems Neuroscience  
10 University Medical Center Hamburg-Eppendorf  
11 20246 Hamburg  
12 Germany  
13 E-mail: [t.lonsdorf@uke.de](mailto:t.lonsdorf@uke.de)  
14 Phone: +49 40 7410 55769  
15 Fax: +49 40 7410 59955  
16

17 **Abstract**

18 Identifying individual differences in the ability to discriminate signals of threat and safety holds great  
19 potential to elucidate etiological mechanisms of pathological anxiety and resilience and may ultimately  
20 foster the development of targeted prevention and clinical intervention programs. Constructs that can be  
21 subsumed under the umbrella term of negative affect such as trait-anxiety (STAI-T), neuroticism (N),  
22 and intolerance of uncertainty (IU) have been suggested to contribute to aberrant fear learning in  
23 different studies. However, collinearity between and individual contributions of these constructs in  
24 relation to fear learning, as well as the neurobiological mechanisms remain unclear. Here, we apply a  
25 multivariate and dimensional approach (structural equation modeling) across multiple units of analyses  
26 (ratings, skin conductance, fear potentiated startle, fMRI) in a differential fear conditioning paradigm in  
27 two independent samples ( $N_{\text{behavioral study 1}}=288$ ;  $N_{\text{fMRI study 2}}=116$ ). Trait-anxiety was identified as the  
28 unique facet of negative affect predicting differences in discriminating signals of threat and safety in  
29 skin conductance responses beyond other measures of negative affect (N, IU). This was replicated in a  
30 second independent sample and extended by showing that the association between trait-anxiety and skin  
31 conductance responding is mediated by differential amygdala activation. These findings elucidate an  
32 intriguing mechanism (discrimination deficits) by which the individual's disposition to experience  
33 anxiety-relevant emotions may confer a predisposition to the development of pathological anxiety and  
34 hence suggest a possible mechanistic target (i.e. discrimination training) for clinical intervention and  
35 prevention.

## 36 Introduction

37 Why do some individuals develop pathological anxiety in the aftermath of trauma while others are  
38 resilient<sup>1</sup>? It has been proposed that this differential vulnerability might hinge on individual differences  
39 in (associative) learning processes<sup>2,3</sup>, representing a core mechanism of the development as well as the  
40 maintenance of pathological fear and anxiety. Importantly these processes can be captured  
41 experimentally in fear conditioning paradigms<sup>4,5</sup>, which serve as translational models in fear and anxiety  
42 research<sup>6,7</sup>. Focusing on individual differences in fear conditioning research<sup>3</sup> is expected to provide  
43 critical insights into the mechanisms underlying individual risk and resilience for the development of  
44 anxiety and/or stress-related disorders<sup>2,3</sup>. Ultimately, this may move the field closer to the development  
45 of mechanism-based prevention and individualized intervention programs contributing to a personalized  
46 medicine approach<sup>8,9</sup>. To date however, the field has generated little clinically usable results as it is  
47 hampered by a number of major methodological and practical challenges<sup>3</sup>.

48 A recent review<sup>3</sup> identified three constructs related to negative affect that have been most  
49 consistently linked to individual differences in fear conditioning performance and vulnerability to  
50 pathological fear and anxiety: Trait-anxiety, neuroticism and intolerance of uncertainty. Trait-anxiety  
51 (STAI-T), reflects the *general* tendency to react *anxiously* and to show cognitive as well as affective  
52 styles related to pathological anxiety to a wide range of events and contexts<sup>10</sup>. Neuroticism (N), a  
53 construct derived factor-analytically, reflects the tendency to *express* negative affect such as anger, envy,  
54 guilt, and depressed mood and assesses the tendency to be emotionally highly reactive and vulnerable  
55 to stress<sup>11</sup>. Finally, intolerance of uncertainty (IU) is defined as the dispositional cognitive bias to  
56 perceive and interpret ambiguous situations as threatening<sup>12,13</sup>.

57 Problematically, despite profound conceptual overlap and empirical collinearity<sup>12</sup>, the majority  
58 of results originate from studies investigating these singular *a-priori* defined ‘risk’ factors *in isolation*<sup>3</sup>  
59 (for few exceptions see <sup>14-18</sup>) - often by using singular outcome measures. A far-reaching problem arising  
60 from such isolated investigations in univariate approaches is that they produce separate lines of research,  
61 which may generate misleading results and leave the best, causal predictor of aberrant fear learning  
62 processes unidentified<sup>3</sup>.

63 Shifting focus towards a more holistic approach necessarily calls for a multimodal approach in  
64 conjunction with specifically tailored multivariate methods beyond commonly applied group  
65 comparisons based on extreme group sampling or post-hoc dichotomization such as median split  
66 procedures— all of which have been subject to substantial criticism<sup>19-22</sup>. To tackle this problem, we here  
67 implement an approach that goes beyond the traditional focus on the investigation of singular *a-priori*  
68 defined ‘risk’ factors and outcome measures *in isolation*<sup>3</sup>: Dimensional analyses using multivariate  
69 structural equation modelling in a large sample ( $N_{\text{study 1}}:288$ ) allow to account for shared variance  
70 between multiple ‘risk’ factors (i.e., STAI-T, N, IU) and outcome measures (i.e., skin conductance  
71 responding (SCR), fear potentiated startle (FPS), subjective ratings) in a single overarching model. As  
72 multiple outcome measures tap into different underlying processes, divergence between measures is  
73 expected to allow for additional mechanistic insights<sup>23</sup>.

74 Surprisingly, the neurocognitive processes underlying the association between negative affect  
75 and fear conditioning remain largely unknown to date<sup>3</sup>, in particular as studies integrating fMRI results  
76 with concurrently acquired psychophysiological measures are lacking<sup>3</sup>. Hence, in a second step, we  
77 address this fundamental gap and advance the findings from study 1 by exploring the neurocognitive  
78 processes underlying the association between fear learning and ‘risk’ factors related to negative  
79 affect<sup>16,24-27</sup> in a large sample ( $N_{\text{study 2}}: 116$ ). This ties together hitherto parallel lines of research through  
80 simultaneous recordings of multiple outcome measures (fMRI, SCRs, subjective ratings).

81 In sum, the primary aim of this work is to identify a unique facet of negative affect related to  
82 differential fear learning through shifting focus from a univariate to a multi-variate, multimodal and  
83 dimensional approach and establish the neurofunctional mechanisms underlying this association.

## 84 **Materials and methods**

### 85 *Participants and questionnaires*

86 404 healthy participants were included (study 1<sub>behavioral</sub>: N=288, 206 female, mean age $\pm$ SE: 24.97 $\pm$ 0.23;  
87 age range: 18-40; study 2<sub>fMRI</sub>: N=116, 44 female, mean age $\pm$ SE: 25.13 $\pm$ 0.32, age range: 19-34). Samples  
88 partially overlap with previously published results that that however focused on post-acquisition  
89 experimental phases<sup>28-31</sup> (see Supplementary Section 1.1 and 2.1 for details on sample characteristics  
90 and recruitment procedures). Trait-anxiety<sup>10</sup> (study 1 and 2), intolerance of uncertainty<sup>13</sup> and  
91 neuroticism<sup>32</sup> (study 1 only) were assessed.

### 92 *Material and procedure*

93 Fear acquisition protocols were identical for all participants within each study (see Supplementary  
94 Section 1.2 and 2.2 for details on materials, timings, and procedures). Fear extinction, reinstatement and  
95 return of fear test phases differed procedurally between both studies and participants<sup>28-31</sup> and were thus  
96 excluded for analyses with respect to individual differences (see Supplementary Section 5 for  
97 explorative extinction analyses). In brief, two black geometric shapes presented on colored backgrounds  
98 (study 1), and two white fractals on grey backgrounds (study 2) served as conditioned stimuli (CSs)  
99 during fear acquisition. One stimulus (CS+) was always followed by an individually adjusted  
100 electrocutaneous unconditioned stimulus (US) whereas the other (CS-) was never followed by the US (100%  
101 reinforcement-rate). A white fixation cross on a black (study 1) or grey (study 2) background served as  
102 ITI.

103 In both studies, the experiment consisted of US intensity calibration, explicitly US-free CS  
104 habituation (study 1: 2CS+/2CS-, study 2: 7CS+/7CS-), and uninstructed fear acquisition (delay  
105 conditioning; study 1: 9CS+/9CS-, study 2: 14CS+/14CS). A startle habituation phase (5 presentations)  
106 preceded CS habituation in study 1.

### 107 *Dependent measures*

108 SCRs and ratings of fear to the CSs were acquired in both studies. According to recommendations<sup>33</sup>  
109 SCRs were semi-manually scored within 0.9-4s after stimulus onset. Amplitudes were range and log  
110 corrected<sup>33</sup>. Ratings were provided on a visual analog scale (0-100) intermittently (study 1) or after each  
111 experimental phase (study 2). fMRI responses were only included in study 2. The amygdala, dorsal  
112 anterior cingulate cortex (dACC), hippocampus, insula, pallidum/putamen, ventromedial prefrontal  
113 cortex (vmPFC) and thalamus served as ROIs as they are key areas implicated in fear conditioning<sup>34,35</sup>.  
114 FPS was triggered by acoustic startle probes (95dB) and recorded using EMG-equipment in study 1, but  
115 not in study 2 due to technical restraints of combined EMG-fMRI acquisition at the time of data  
116 acquisition. FPS responses were semi-manually scored between 0.20-0.12s after startle probe onset.  
117 Amplitudes were t-transformed. CS-US contingency awareness was assessed after the experiment (i.e.,  
118 after extinction and return of fear; study 1) or directly after fear acquisition (study 2). See Supplementary  
119 Section 1.3 and 2.3 for details on response registration and processing.

### 120 *Data analysis*

121 Statistical analyses were performed with IBM SPSS Statistics 22 and AMOS for Windows (Armonk,  
122 NY). P-values<0.05 were considered significant and Greenhouse-Geisser corrections were applied when  
123 appropriate. Partial eta<sup>2</sup> ( $\eta^2$ ) was used as measure of effect size. fMRI data were preprocessed and  
124 analyzed in SPM8 (Wellcome Trust Centre for Neuroimaging, UCL, London, UK) (see Supplementary

125 Section 2.3 for details on fMRI data acquisition, processing and analysis). In brief, the primary CS-  
126 discrimination contrasts (CS+>CS-; CS->CS+) were estimated on the first level and taken into the  
127 second level analysis employing voxel-wise regression analyses with the STAI-T. A ROI-based voxel-  
128 wise approach was employed, and small volume (SVC) family wise error (FWE) corrected at  $p < 0.05$ .

### 129 *Comparability to traditional analyses employed in the field*

130 To allow comparability of results in study 1 with published studies, and for illustrative purposes,  
131 repeated measures ANOVAs (CS-type: mean CS+, mean CS- during fear acquisition) with dimensional  
132 scores of each construct (STAI-T, N, IU) as co-variate were conducted *separately* for the three  
133 dependent measures (SCR, ratings, FPS). Similarly, repeated measures ANOVAs (CS-type: mean CS+,  
134 mean CS- during fear acquisition) with categorical classifications (median-split and quartile-split  
135 groups) based on construct scores for all three questionnaires in isolation as between subject variable  
136 are provided for comparability (see Supplementary Table 1 for descriptives of categorical-groups).  
137 Significant effects with respect to CS-discrimination were followed-up by CS-specific (i.e., CS+ and  
138 CS- separately) analyses.

### 139 *Analyses of main interest: Path analyses for study 1 and 2*

140 Importantly, structural equation modelling was performed to allow for multivariate analyses. For study  
141 1, the full model included the three constructs (STAI-T, N, IU) and the three outcome measures of CS-  
142 discrimination (SCR, fear ratings, FPS; CS+>CS- contrast). For study 2, the full model included the  
143 STAI-T, SCRs and fear ratings as well as extracted peak parameter estimates from brain regions showing  
144 significant activation during fear acquisition (parameter estimates of CS+>CS- contrast derived from  
145 regression analyses with STAI-T) in fMRI analyses. All possible connections (i.e. direct and indirect  
146 paths between all variables) were allowed in full models. Subsequently, backward selection of non-  
147 significant paths converged into final path models. Trends ( $p < 0.1$ ) were included in interim models but  
148 not in final models. Significance levels were set at  $p < 0.05$ . Significant effects with respect to CS-  
149 discrimination were followed-up by CS-specific path models (i.e., CS+ and CS- separately). Two-sided  
150 model fit was assessed using root mean square error of approximation (RMSEA) with thresholds of  
151  $< 0.01, < 0.05, < 0.08, < 0.10$ , and  $> 0.10$  indicating excellent, good, fair, mediocre or poor fit of the final  
152 model<sup>36,37</sup>. Reported regression coefficients reflect standardized betas. Indirect (i.e., mediation) paths  
153 were calculated using bootstrapping and the bias-corrected percentile method.

## 154 **Results**

### 155 *Main effects of task (study 1 and 2)*

156 Successful fear acquisition was demonstrated in both studies by significantly larger average CS+ than  
157 CS- responding (study 1: SCR, ratings, FPS, all  $p$ 's  $< 0.001$ ; Supplementary Figure 2; study 2: SCRs and  
158 ratings, both  $p$ 's  $< 0.003$ , Supplementary Figure 4).

159 On a neuro-functional level (study 2) CS-discrimination (CS+>CS-) was reflected by enhanced  
160 activation of areas typically activated in fear acquisition<sup>34,35</sup> (i.e., thalamus, amygdala, dmPFC/dACC,  
161 insula/frontal operculum and putamen/pallidum; Supplementary Figure 4C, Supplementary Table 3).  
162 Stronger activation to the CS- than the CS+ was observed in the vmPFC (Supplementary Figure 4D,  
163 Supplementary Table 3).

### 164 *Dimensional analyses for each construct and outcome measure in isolation (study 1)*

165 SCRs: All three constructs (STAI-T, IU, N) were significantly negatively associated with CS-  
166 discrimination in SCRs (CS-type\*construct interaction; all  $p$ 's  $< 0.045$ , Table 1A) indicating decreasing

167 CS-discrimination with increasing construct scores (Figure 1A-C). This interaction was primarily driven  
168 by enhanced CS+ responses in individuals scoring low on IU ( $p=0.03$ ) and STAI-T ( $p=0.057$ ), despite  
169 comparable CS- responding (Table 1A). The significant impact of N on CS-discrimination could  
170 however not be assigned to either CS+ or CS- responding alone (Table 1). Main effects of the constructs  
171 on general SCR responding (all  $p$ 's $>0.09$ , Table 1) or associations with unconditioned SCRs to the US  
172 (all  $F$ 's $<1.56$ , all  $p$ 's $>0.213$ ) were absent.

173 *Fear ratings:* None of the three constructs was significantly associated with CS-discrimination  
174 in fear ratings (CS-type\*construct; all  $p$ 's $>0.288$ , Table 1). However, significant or trend-wise main  
175 effects were observed (STAI-T:  $p=0.046$ , IU,  $p=0.092$ , N:  $p=0.002$ , Table 1A), indicative of generally  
176 heightened fear ratings with increasing construct scores.

177 *FPS:* Only IU was significantly linked to FPS CS-discrimination (CS-type\*IU,  $p=0.022$ ; for N  
178 and STAI-T: both  $p$ 's $>0.13$ , Table 1A, Supplementary Section 3.2) in absence of main effects of any  
179 construct on FPS responsivity (all  $F$ 's $<1$ ). More precisely, higher IU scores were associated with low  
180 FPS CS-discrimination. Tentatively, this effect was driven by reduced CS+ responding in individuals  
181 scoring high on IU ( $p=0.07$ ), whereas CS- responding did not differ depending on IU score ( $p=0.16$ ).

182 *Categorical analyses for each construct and outcome measure in isolation (study 1)*

183 Analyses employing categorical operationalization by median-split or quartile-split groups (Table 1B-  
184 C provides statistics for all outcome measures, Figure 1D-F illustrates SCR results) are largely  
185 comparable to dimensional analyses for all three outcome measures despite the association between N  
186 and CS-discrimination not meeting statistical significance in categorical analyses.

187 **Table 1.** Statistical values from univariate repeated measures analyses in study 1 for the three different constructs related to negative affect: trait anxiety (STAI-T),  
 188 neuroticism (N) and intolerance of uncertainty (IU) for (A) dimensional analyses as well as analyses based on (B) median split procedure or (C) quartile groups for  
 189 the three outcome measures skin conductance (SCR), fear ratings, and fear potentiated startle (FPS) during fear acquisition training.

190 **A. Dimensional analyses per construct**

|                                | SCR                                                                           |                                                                              |                                                                              | Fear ratings                                                                 |                                                                              |                                                 | FPS                                          |                                              |                                                                            |
|--------------------------------|-------------------------------------------------------------------------------|------------------------------------------------------------------------------|------------------------------------------------------------------------------|------------------------------------------------------------------------------|------------------------------------------------------------------------------|-------------------------------------------------|----------------------------------------------|----------------------------------------------|----------------------------------------------------------------------------|
|                                | STAI-T                                                                        | N                                                                            | IU                                                                           | STAI-T                                                                       | N                                                                            | IU                                              | STAI-T                                       | N                                            | IU                                                                         |
| <i>Main effects</i>            |                                                                               |                                                                              |                                                                              |                                                                              |                                                                              |                                                 |                                              |                                              |                                                                            |
| <b>Construct</b>               | F(1,269)<1                                                                    | F(1,269)<1                                                                   | F(1,269)=2.84,<br>p=0.09                                                     | <b>F(1,266)=4.03,</b><br><b>p=0.046,</b><br><b>p<math>\eta^2</math>=0.02</b> | <b>F(1,266)=7.22,</b><br><b>p=0.008,</b><br><b>p<math>\eta^2</math>=0.03</b> | F(1,266)=2.87,<br>p=0.092                       | F(244)<1                                     | F(1,244)<1                                   | F(244)<1                                                                   |
| <b>CS-type</b>                 | F(1,269)=26.22,<br>p<0.001,<br>p $\eta^2$ =0.09                               | F(1,269)=22.50,<br>p<0.001,<br>p $\eta^2$ =0.08                              | F(1,269)=26.14,<br>p<0.001,<br>p $\eta^2$ =0.09                              | F(1,266)=18.63,<br>p<0.001,<br>p $\eta^2$ =0.07                              | F(1,266)=27.66,<br>p<0.001,<br>p $\eta^2$ =0.09                              | F(1,266)=26.79,<br>p<0.001,<br>p $\eta^2$ =0.09 | F(244)=6.64,<br>p=0.011,<br>p $\eta^2$ =0.03 | F(244)=6.92,<br>p=0.009,<br>p $\eta^2$ =0.03 | F(244)=13.06,<br>p<0.001,<br>p $\eta^2$ =0.05                              |
| <i>Interaction effects</i>     |                                                                               |                                                                              |                                                                              |                                                                              |                                                                              |                                                 |                                              |                                              |                                                                            |
| <b>CS-type *<br/>Construct</b> | <b>F(1,269)=11.23,</b><br><b>p=0.001,</b><br><b>p<math>\eta^2</math>=0.04</b> | <b>F(1,269)=4.05,</b><br><b>p=0.045,</b><br><b>p<math>\eta^2</math>=0.02</b> | <b>F(1,269)=8.69,</b><br><b>p=0.03,</b><br><b>p<math>\eta^2</math>=0.03</b>  | F(1,266)<1                                                                   | F(1,266)=1.13,<br>p=0.288                                                    | F(1,266)<1                                      | F(244)=2.26,<br>p=0.13                       | F(244)<1                                     | <b>F(244)=5.32,</b><br><b>p=0.022,</b><br><b>p<math>\eta^2</math>=0.02</b> |
| <b>CS+ *<br/>Construct</b>     | F(1,269)=3.66,<br>p=0.057,<br>p $\eta^2$ =0.01                                | F(1,269)<1                                                                   | <b>F(1,269)=6.06,</b><br><b>p=0.014,</b><br><b>p<math>\eta^2</math>=0.02</b> | --                                                                           | --                                                                           | --                                              | --                                           | --                                           | F(244)=3.25,<br>p=0.07                                                     |
| <b>CS- *<br/>Construct</b>     | F(1,269)<1                                                                    | F(1,254)=1.85,<br>p=0.18                                                     | F(1,269)<1                                                                   | --                                                                           | --                                                                           | --                                              | --                                           | --                                           | F(244)=1.96,<br>p=0.16                                                     |

191 **B. Categorical analyses (median-split)**

|                             | SCR                                             |                                                 |                                                 | Fear ratings                                     |                                                                              |                                                  | FPS                                             |                                                 |                                                 |
|-----------------------------|-------------------------------------------------|-------------------------------------------------|-------------------------------------------------|--------------------------------------------------|------------------------------------------------------------------------------|--------------------------------------------------|-------------------------------------------------|-------------------------------------------------|-------------------------------------------------|
|                             | STAI-T                                          | N                                               | IU                                              | STAI-T                                           | N                                                                            | IU                                               | STAI-T                                          | N                                               | IU                                              |
| <i>Main effects</i>         |                                                 |                                                 |                                                 |                                                  |                                                                              |                                                  |                                                 |                                                 |                                                 |
| <b>Construct-<br/>group</b> | F(1,269)=1.85,<br>p=0.18                        | F(1,269)<1                                      | F(1,269)<1                                      | F(1,266)=3.27,<br>p=0.07                         | <b>F(1,266)=9.95,</b><br><b>p=0.002,</b><br><b>p<math>\eta^2</math>=0.04</b> | F(1,266)=2.89,<br>p=0.09                         | F(1,244)<1                                      | F(1,244)=1.19,<br>p=0.28                        | F(1,244)<1                                      |
| <b>CS-type</b>              | F(1,269)=62.70,<br>p<0.001,<br>p $\eta^2$ =0.19 | F(1,269)=60.83,<br>p<0.001,<br>p $\eta^2$ =0.01 | F(1,269)=60.45,<br>p<0.001,<br>p $\eta^2$ =0.18 | F(1,266)=290.64,<br>p<0.001,<br>p $\eta^2$ =0.52 | F(1,266)=291.28,<br>p<0.001,<br>p $\eta^2$ =0.52                             | F(1,266)=290.56,<br>p<0.001,<br>p $\eta^2$ =0.52 | F(1,244)=23.78,<br>p<0.001,<br>p $\eta^2$ =0.09 | F(1,244)=23.57,<br>p<0.001,<br>p $\eta^2$ =0.09 | F(1,244)=22.78,<br>p<0.001,<br>p $\eta^2$ =0.09 |

*Interaction effects*

|                                  |                                                              |            |                                                              |                       |            |            |            |            |                                                             |
|----------------------------------|--------------------------------------------------------------|------------|--------------------------------------------------------------|-----------------------|------------|------------|------------|------------|-------------------------------------------------------------|
| <b>CS-type * Construct-group</b> | <b>F(1,269)=9.170, p=0.003, <math>\rho\eta^2=0.03</math></b> | F(1,269)<1 | <b>F(1,269)=9.193, p=0.003, <math>\rho\eta^2=0.03</math></b> | F(1,266)=1.25, p=0.27 | F(1,266)<1 | F(1,266)<1 | F(1,244)<1 | F(1,244)<1 | <b>F(1,244)=5.64, p=0.018, <math>\rho\eta^2=0.02</math></b> |
| <b>CS+ * Construct-group</b>     | <b>F(1,269)=4.91, p=0.028, <math>\rho\eta^2=0.02</math></b>  | --         | F(1,269)=1.76, p=0.19                                        | --                    | --         | --         | --         | --         | F(1,244)=3.79, p=0.053, $\rho\eta^2=0.02$                   |
| <b>CS- * Construct-group</b>     | F(1,269)<1                                                   | --         | F(1,269)=1.14, p=0.29                                        | --                    | --         | --         | --         | --         | F(1,245)=1.85, p=0.18                                       |

192 C. Categorical analyses (quartile-split)

|                                  | SCR                                                         |                                            |                                                             | Fear ratings                                |                                                            |                                             | FPS                                        |                                            |                                            |
|----------------------------------|-------------------------------------------------------------|--------------------------------------------|-------------------------------------------------------------|---------------------------------------------|------------------------------------------------------------|---------------------------------------------|--------------------------------------------|--------------------------------------------|--------------------------------------------|
|                                  | STAI-T                                                      | N                                          | IU                                                          | STAI-T                                      | N                                                          | IU                                          | STAI-T                                     | N                                          | IU                                         |
| <i>Main effects</i>              |                                                             |                                            |                                                             |                                             |                                                            |                                             |                                            |                                            |                                            |
| <b>Construct-group</b>           | F(3,267)=1.67, p=0.17                                       | F(3,267)<1                                 | F(3,267)<1                                                  | F(3,264)=1.32, p=0.27                       | <b>F(3,264)=3.97, p=0.09, <math>\rho\eta^2=0.04</math></b> | F(3,264)=1.43, p=0.23                       | F(3,242)<1                                 | F(3,242)=1.47, p=0.22                      | F(3,242)<1                                 |
| <b>CS-type</b>                   | F(1,267)=61.76, p<0.001, $\rho\eta^2=0.19$                  | F(1,267)=62.09, p<0.001, $\rho\eta^2=0.19$ | F(1,267)=62.85, p<0.001, $\rho\eta^2=0.19$                  | F(1,264)=293.06, p<0.001, $\rho\eta^2=0.53$ | F(1,254)=272.23, p<0.001, $\rho\eta^2=0.52$                | F(1,264)=289.47, p<0.001, $\rho\eta^2=0.52$ | F(1,242)=24.00, p<0.001, $\rho\eta^2=0.09$ | F(1,242)=23.96, p<0.001, $\rho\eta^2=0.09$ | F(1,242)=23.36, p<0.001, $\rho\eta^2=0.09$ |
| <i>Interaction effects</i>       |                                                             |                                            |                                                             |                                             |                                                            |                                             |                                            |                                            |                                            |
| <b>CS-type * Construct-group</b> | <b>F(3,267)=3.59, p=0.014, <math>\rho\eta^2=0.04</math></b> | F(1,267)=1.76, p=0.16                      | <b>F(3,267)=4.83, p=0.003, <math>\rho\eta^2=0.05</math></b> | F(3,264)=1.32, p=0.27                       | F(3,254)=1.32, p=0.27                                      | F(3,264)=1.43, p=0.23                       | F(3,242)=1.75, p=0.16                      | F(3,242)=1.57, p=0.20                      | F(3,242)=2.53, p=0.06                      |
| <b>CS+ * Construct-group</b>     | F(1,267)=2.16, p=0.093                                      | --                                         | F(1,267)=1.58, p=0.20                                       | --                                          | --                                                         | --                                          | --                                         | --                                         | --                                         |
| <b>CS- * Construct-group</b>     | F(1,267)=1.67, p=0.17                                       | --                                         | F(1,267)=1.41, p=0.24                                       | --                                          | --                                                         | --                                          | --                                         | --                                         | --                                         |

193



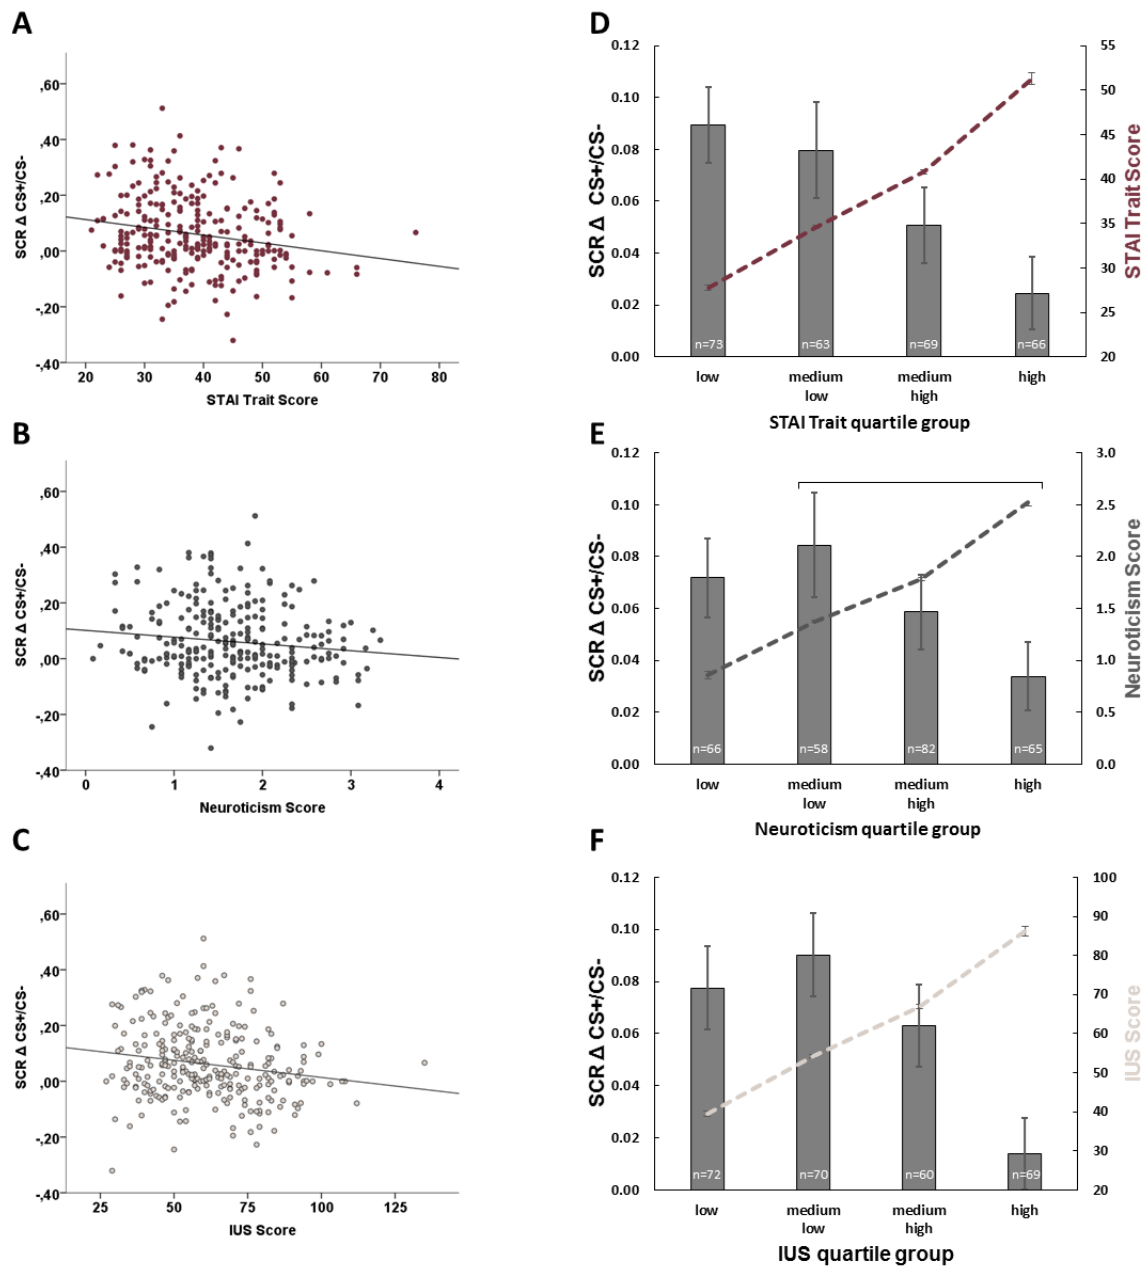

194  
195

196 **Figure 1. Dimensional and categorical display of the relation between SCR discrimination and**  
 197 **negative affect constructs.** Scatterplots display CS-discrimination during fear acquisition (Study 1) in  
 198 SCRs (in  $\mu$ S, log, range-corrected) and its relation to STAI trait (A), neuroticism (B) and intolerance of  
 199 uncertainty (C) scores as well as bar charts displaying mean SCR CS-discrimination during fear  
 200 acquisition (indicated by the bars) as well as number of individuals (n) for quartile groups (low, medium  
 201 low, medium high, high) differing in STAI trait mean scores (D), neuroticism mean scores (E) and IU  
 202 mean scores (F), which are indicated as mean scores per group by the dashed lines in each bar graph  
 203 (see Supplementary Table 1 for descriptives and details on median-split and quartile groups). Error bars  
 204 represent SEM. Note that the STAI is not a diagnostic tool and no clinical cut off score is available.  
 205 Typical scores for patients diagnosed with anxiety disorders are however in the range of 47 and above  
 206 <sup>38</sup>, which corresponds to ~18.4% in this sample.

207 *Integration of multiple constructs of negative affect and multiple outcome measures of fear learning in*  
 208 *multivariate analyses (study 1)*

209 A multivariate analysis (i.e., path model) accounting for shared variance between the three  
 210 questionnaires shows the expected strong positive associations between constructs (STAI-T, IU, N) and  
 211 outcome measures (SCRs, FPS, ratings), all  $p$ 's  $< 0.001$ , Figure 2. Importantly, the final model reveals a  
 212 *unique* impact of STAI-T on CS-discrimination in SCRs (standardized path coefficient:  $-0.19$ ,  $p < 0.001$ )  
 213 in absence of significant associations with IU or N despite significant associations of all three constructs  
 214 with SCRs CS-discrimination in univariate analyses (see above). This implies that the association of N  
 215 and IU with differential fear acquisition is fully explained by shared variance with trait-anxiety.

216 Additionally, and congruent with univariate analyses, a *unique* impact of IU on CS-  
 217 discrimination in FPS was observed (standardized path coefficient:  $-0.14$ ,  $p = 0.024$ ).

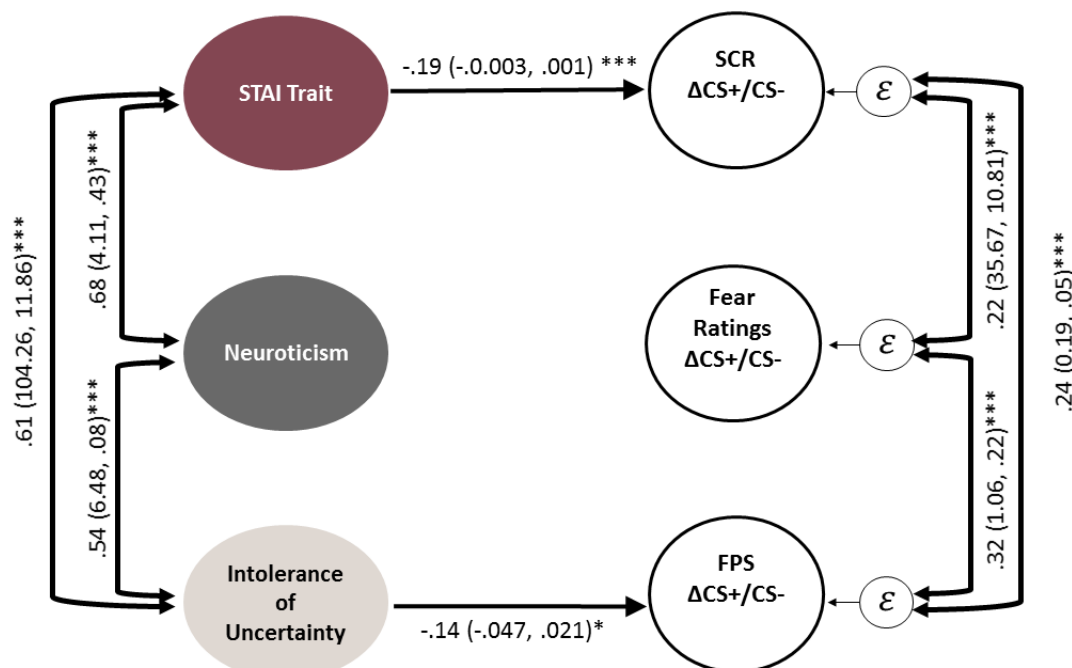

218 **Figure 2. Final path model (study 1) showing the association between three different constructs**  
 219 **related to negative affect (STAI trait, neuroticism and intolerance of uncertainty) and CS-**  
 220 **discrimination during fear acquisition as assessed by three different outcome measures (skin**  
 221 **conductance responses, SCRs, fear ratings and fear potentiated startle, FPS).** The lines are labeled  
 222 with standardized path coefficients. Regression weight estimates and standard errors are shown in  
 223 parenthesis. Asterisks indicate statistical significance \*\*\* $p < 0.001$ , \* $p < 0.05$ . Black bold lines indicate  
 224 significant paths of the final model while any other connections between the variables not shown  
 225 indicate that these connections, which were included in the saturated (i.e., initial) model, are excluded  
 226 from the final model due to the lack of statistical significance for this path. Note, that we performed a  
 227 backward selection of non-significant path starting from this saturated model (see methods). The final  
 228 path model showed an excellent model fit (RMSEA  $< 0.001$ ).

229 *Neural mechanism mediating the association between trait-anxiety and SCRs CS discrimination (study*  
 230 *2).*

231 Higher STAI-T scores were associated with significantly stronger CS-discrimination related activation  
 232 of the right amygdala ( $p[\text{SVC}_{\text{FWE}}] = 0.006$ , Figure 3A,D), the right putamen ( $p[\text{SVC}_{\text{FWE}}] = 0.005$ , Figure  
 233 3B,E) and the left thalamus ( $p[\text{SVC}_{\text{FWE}}] = 0.040$  and Figure 3C,F) during fear acquisition in regression

234 analyses (Table 2 and Supplementary Table 4 for an exploratory whole brain analysis). These areas are  
 235 also significantly implicated in CS-discrimination irrespective of STAI-T in this sample (see above,  
 236 main effects of task). Congruent with study 1, these effects are driven by positive associations between  
 237 STAI-T scores and CS+ related, but not CS- related, neural activation (amygdala(R):  $x,y,z=22,-4,-16$ ;  
 238  $k=5$ ;  $T=3.58$ ;  $p[SVC_{FWE}] = 0.014$ ; amygdala(L):  $x,y,z=-22,-12,-12$ ;  $k=3$ ;  $T=3.34$ ;  $p[SVC_{FWE}] = 0.023$ ;  
 239 putamen(R):  $x,y,z=22,20,-6$ ;  $k=7$ ;  $T=3.51$ ;  $p[SVC_{FWE}] = 0.043$ ; thalamus(L):  $x,y,z=-10,-28,10$ ;  $k=135$ ;  
 240  $T=4.49$ ;  $p[SVC_{FWE}] = 0.003$ ).

241 The final multivariate path model for study 2 (Figure 3G) also illustrates this significant positive  
 242 association between STAI-T and parameters extracted from the above described regression analyses  
 243 (i.e., CS-discrimination related amygdala, putamen and thalamus activation). Importantly, also  
 244 significant positive associations (direct effects) between differential (CS+>CS-) amygdala activation and  
 245 SCR CS-discrimination (again driven by CS+ responses; not shown) was observed. Replicating results  
 246 of study 1, STAI-T and differential SCRs correlated significantly negative (direct effect, Figure 3G) –  
 247 however in a CS-unspecific manner. Importantly, also the indirect path between SCR CS-discrimination  
 248 and STAI-T was significant, indicating partial mediation of STAI-T on SCR CS-discrimination through  
 249 CS-discrimination in the amygdala ( $p=0.004$ ; Figure 3G dashed line).

250 **Table 2.** Neural activation reflecting significant ROI-based results ( $p < 0.05$   $SVC_{FWE}$ ) for a regression of trait-  
 251 anxiety on CS discrimination during fear acquisition training (study 2). Cluster size  $k$  and coordinates  $x$ ,  $y$  and  $z$   
 252 of the respective cluster are reported. Note that CS-specific follow-up regression analyses (i.e. CS+ and CS-  
 253 separately) are reported in the main text. Results of an exploratory whole-brain analysis at  $p < 0.001$  uncorrected  
 254 (uc) is included in Supplementary Section 4.2 for completeness.

| Contrast | Brain area   | k  | x  | y   | z   | T    | p(uc)  | p( $SVC_{FWE}$ ) |
|----------|--------------|----|----|-----|-----|------|--------|------------------|
| CS+>CS-  | putamen (R)  | 98 | 22 | 18  | -6  | 4.05 | <0.001 | <b>0.005</b>     |
|          |              |    | 28 | 12  | -2  | 3.97 | <0.001 | <b>0.006</b>     |
|          | amygdala (R) | 6  | 26 | -10 | -12 | 3.50 | <0.001 | <b>0.011</b>     |
|          |              |    | 28 | -6  | -14 | 3.29 | 0.001  | <b>0.019</b>     |
|          | thalamus (L) | 5  | -2 | -20 | 12  | 3.38 | 0.001  | <b>0.040</b>     |
|          |              | 10 | -8 | -10 | 8   | 3.36 | 0.001  | <b>0.042</b>     |
| CS->CS+  | none         |    |    |     |     |      |        |                  |

255 *Awareness and US intensity are not associated with trait-anxiety (study 1 and 2)*

256 Neither awareness of CS contingencies nor US intensity was significantly associated with any of the  
 257 trait constructs in study 1 and 2 (study 1/2: Supplementary Section 3.3-3.4/4.3-4.4), although individuals  
 258 being unaware of CS-contingencies scored trend-wise higher on STAI-T and IU in study 1. Importantly,  
 259 incorporating awareness in the path model did not cause changes in the final path model.

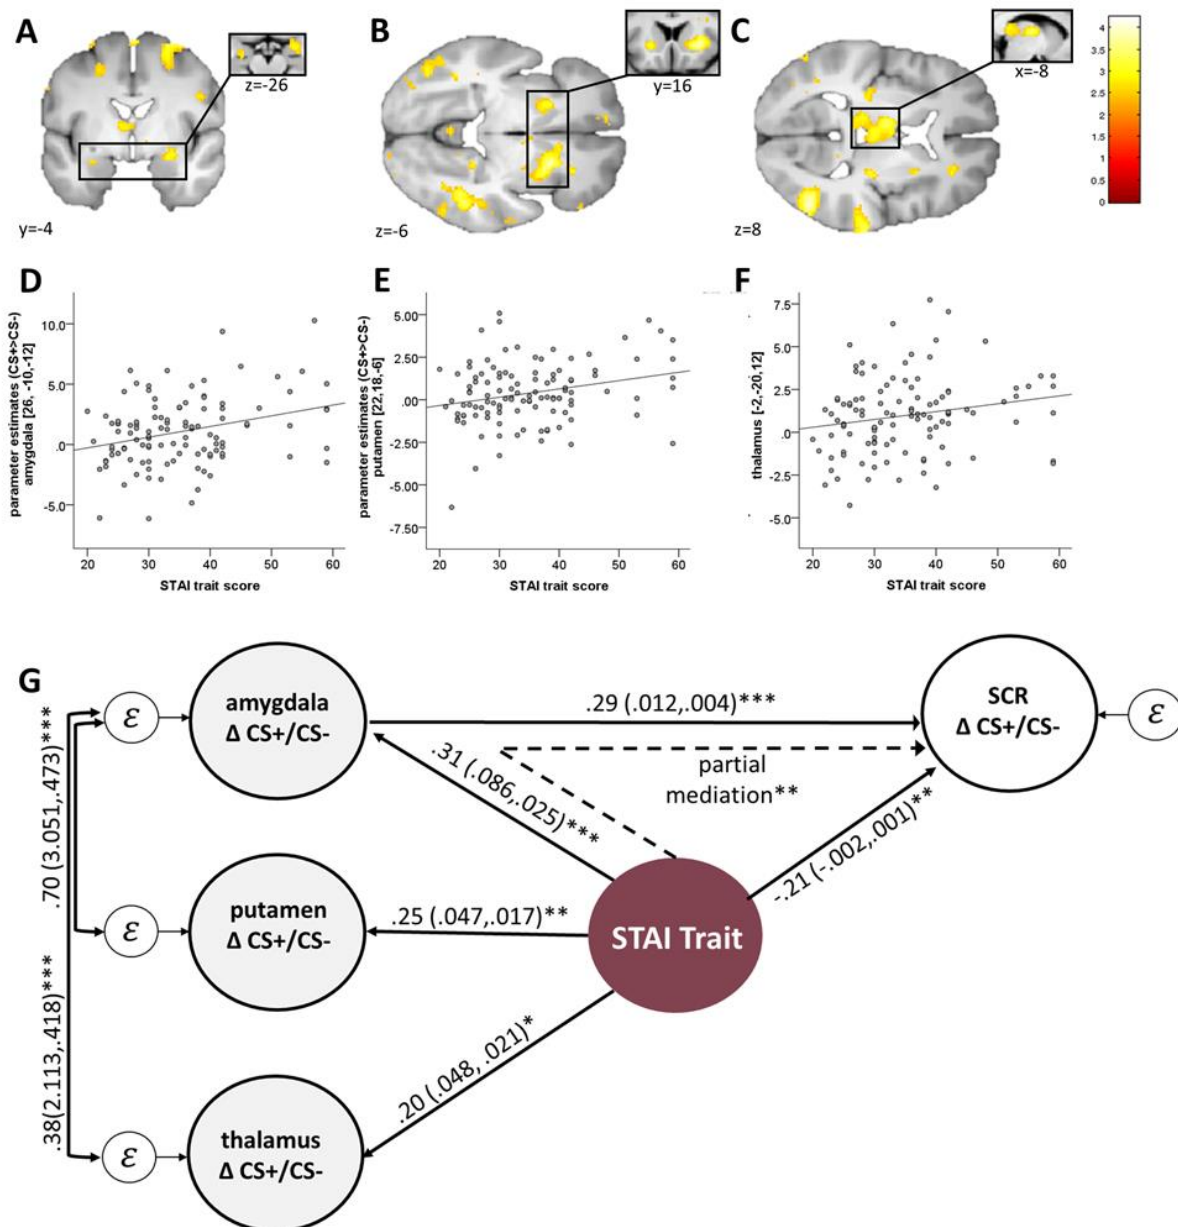

260 **Figure 3. Neural activation reflecting a regression of trait-anxiety (STAI-T) on CS-discrimination**  
 261 **during fear acquisition (study 2) in the (A) amygdala, (B) putamen and (C) thalamus as well as**  
 262 **scatter plots presenting the association between trait-anxiety and extracted peak voxel parameter**  
 263 **estimates (CS+>CS-) in the (D) amygdala, (E) putamen and the (F) thalamus, which are also fed**  
 264 **into the path model displayed in (G). A display threshold of  $p < 0.01_{uc}$  was employed to illustrate the**  
 265 **extent of peak activations but note that statistics are based on FWE-corrected values (see methods). Note**  
 266 **that CS-specific follow-up analyses (i.e., separate analyses for the CS+ and the CS- are reported in the**  
 267 **main text) indicate CS+-specific effects. (G) Final path model of the positive association (direct path**  
 268 **indicated by solid lines) between trait-anxiety and CS-discrimination in the amygdala, thalamus and**  
 269 **putamen as well as a positive association between CS-discrimination in the amygdala and CS-**  
 270 **discrimination in autonomic (i.e. SCR) measures. The significant effect of a negative association of**  
 271 **STAI-T on SCR CS-discrimination, replicating results observed in study 1, was complemented by a**  
 272 **partial mediation of the impact of STAI-T on SCR CS-discrimination via CS-discrimination in the**  
 273 **amygdala [indirect (i.e., mediation) path indicated by the dashed line].**  
 274 **Standardized path coefficients are displayed and regression weights as well as SEM are provided in**  
 275 **parentheses. The final model shows a good fit of the data (RMSEA=0.047). Note, that we performed a**

276 backward selection of non-significant path starting from a saturated model (see methods). Thus paths  
277 not included in the figure (i.e., all possible connections including CS-discrimination in subjective ratings  
278 and paths from putamen and thalamus to SCR CS-discrimination) were non-significant. Asterisks  
279 indicate statistical significance \*\*\* $p < 0.001$ , \*\* $p < 0.01$ , \* $p < 0.05$ .

## 280 Discussion

281 Our work identifies trait-anxiety as the key facet of negative affect associated with differential fear  
282 acquisition in SCRs beyond conceptually and empirically related constructs (i.e., neuroticism and  
283 intolerance of uncertainty) by employing a multivariate and multimodal approach in a large sample  
284 (N=288). Furthermore, we replicate and refine this association in an independent sample (N=116) by  
285 demonstrating that the ability to discriminate between danger and safety signals physiologically (i.e.,  
286 SCRs) is partly *mediated* through differential (CS+>CS) amygdala activation— a core region implicated  
287 in fear processing<sup>39–43</sup>. Having identified trait-anxiety (STAI-T) as the unique facet of negative affect  
288 and having identified the neurobiological mechanisms underlying this association, brings together  
289 hitherto loose ends of research and provides insight into how individual differences may contribute to  
290 risk and resilience for pathological fear<sup>3,44</sup>.

291 Notably, *not* accounting for conceptual and empirical collinearity between measures of negative  
292 affect revealed similar effects of STAI-T, N and IU on CS-discrimination. Hence, we argue that this  
293 commonly employed *isolated*, univariate approach can yield misleading findings<sup>3</sup>, as results derived  
294 from the multivariate approach employed here imply that the association of N and IU with SCR CS-  
295 discrimination is fully explained by their shared variance with STAI-T. Yet, STAI-T has been criticized  
296 for representing a psychometrically inhomogeneous scale itself<sup>45</sup>, capturing facets of anxiety and  
297 depression<sup>45–48</sup>. Hence, while selection of constructs for study 1 was based on the mere abundance of  
298 empirical work in fear conditioning<sup>3</sup>, future studies may consider measures of depression to further  
299 narrow down the underlying causal facet(s).

300 Furthermore, we provide a mechanistic link between inter-individual differences in  
301 physiological and neural responding to learned threats. Importantly, simultaneous acquisition of these  
302 measures integrates hitherto unconnected reports of associations between STAI-T and differential  
303 amygdala activation<sup>27,49</sup> as well as differential amygdala activation and differential SCRs during fear  
304 acquisition<sup>50,51</sup> but see 25,26 or fear expression<sup>27</sup>. In addition, our work provides evidence for an involvement  
305 of the amygdala in individual differences underlying the *strength of fear learning* beyond the average  
306 (i.e., a general role in fear acquisition and expression). Interestingly, direct associations between STAI-  
307 T and CS-discrimination in SCRs were negative, while indirect associations through the amygdala were  
308 positive. This suggests that besides this indirect path over the amygdala other sources of variance must  
309 influence associations between STAI-T and CS-discrimination in SCRs<sup>52</sup>. In other domains of threat  
310 processing, i.e. facial threat processing<sup>53</sup>, similar positive associations between STAI-T and amygdala  
311 reactivity have been observed<sup>54</sup>, which again highlights the robustness of our results. Considering fear  
312 conditioning as a valid model for pathological fear acquisition<sup>4,55</sup>, these results may translate into  
313 insights in the underlying mechanisms through which enhanced amygdala reactivity may predict the  
314 development pathological anxiety<sup>56</sup> or may provide a future intervention point.

315 Relatedly, the impact of STAI-T on CS-discrimination in both SCRs (study 1) and neural  
316 activation (study 2) exerted its influence primarily through differential CS+ (i.e., excitatory) but not CS-  
317 related responding<sup>27,50</sup> despite opposed directionality of direct effects. Importantly, in experimental  
318 designs employing a 100% reinforcement rate, STAI-T-related CS-discrimination has been attributed to  
319 differential responding to the CS+ (present results and one previous study on fear expression<sup>27</sup>). This  
320 high reinforcement rate can be assumed to generate an unambiguous (i.e., strong) experimental  
321 situation<sup>3,57</sup>. At first glance, these results seem to stand in contrast to previous reports on associations  
322 between STAI-T and deficits in *safety signal* (e.g., CS-) processing<sup>58–61</sup>. It is however noteworthy, that



323 the impact of individual difference factors on conditioned responding is likely impacted and moderated  
324 by seemingly subtle study design specifications such as the level of experimental ambiguity induced for  
325 instance through CS-US contingency instructions or variations in the reinforcement rate<sup>3,23</sup>. As such, it  
326 appears that studies linking STAI-T to *inhibitory processes* in fear conditioning might be characterized  
327 by relatively more ambiguous experimental situations through for instance lower reinforcement rates<sup>58-</sup>  
328 <sup>61</sup>. This speculation (for similar findings in decision making see<sup>62</sup>) has however not yet been addressed  
329 experimentally and mechanistic conclusions are hampered by the frequent unavailability of precise  
330 information on the nature of the observed CS-discrimination differences<sup>3</sup>. Hence, we urge authors to  
331 focus more on these underlying processes in future studies to facilitate mechanistic conclusions<sup>3</sup>.

332 Our dimensional approach<sup>63</sup> in large samples allowed capturing the full range of STAI-T  
333 including scores falling well within the range observed in clinical populations<sup>64,65</sup> (10-18% of the  
334 samples). Of note, participants included in this study were free of any current or past neuropsychological  
335 disorder and in fact might represent highly resilient individuals able to maintain a high level of  
336 functioning despite being ‘at risk’ (i.e., scoring high on anxiety)<sup>3</sup>. Hence, future studies should focus on  
337 more heterogeneous populations including clinically diagnosed patient samples. Importantly, our work  
338 has major implications for the interpretation of past and future studies: We provide empirical evidence  
339 that the range of STAI-T scores in a given population critically influences the likelihood to observe a  
340 significant impact of STAI-T on CS-discrimination – a conclusion likely generalizing to other individual  
341 difference factors. Furthermore, our results imply that good characterization and reporting of study  
342 populations and experimental parameters is highly important especially in individual difference  
343 research<sup>3</sup>.

344 Our multivariate approach across multiple units of analyses (i.e., outcome measures), revealed  
345 a rather specific association between STAI-T and responding to *danger signals* as assessed by SCRs or  
346 amygdala activation in two studies, whereas IU was specifically linked to CS-discrimination in FPS.  
347 Studies reporting associations of STAI-T with *safety signal* processing in turn have also reported  
348 findings based on FPS, and ratings of distress<sup>59</sup>, US expectancy<sup>60,61</sup> or fear<sup>61</sup>. As SCRs to the CS- often  
349 consist of non-responses (i.e., zero responses), CS- responding can be less reliably assessed in SCRs as  
350 opposed to measures that rely on triggered responses and therefore ensure a certain response frequency  
351 (e.g., FPS, ratings)<sup>23,30</sup>. Consequently, this restricted variance in CS- responses might cause possible  
352 floor-effects that hamper valid interpretations concerning safety learning and the detection of individual  
353 differences<sup>3,66</sup>. Finally, null findings with respect to STAI-T and conditioned responding across outcome  
354 measures<sup>14,26,67-72</sup> are difficult to interpret as sample sizes for these studies fall well below the minimally  
355 required number of 64 participants (calculated for median-split analyses based on study 1) with one  
356 exception<sup>72</sup>.

357 Importantly, the specific dissociations in outcome measures and constructs (i.e., specific  
358 association of STAI-T with CS-discrimination in SCRs, and IU with CS-discrimination in FPS) may  
359 provide mechanistic insights into the underlying processes. Different outcome measures capture and  
360 reflect diverse aspects of fear processing<sup>23</sup>: SCRs are thought to reflect general arousal which lines up  
361 with the STAI-T being a measure of general anxiety proneness. FPS in turn is considered a rather fear  
362 specific index<sup>23</sup> that per definition reflects an enhanced reflexive response towards an unexpected, and  
363 therewith uncertain, event. Hence, both results may carry complementary mechanistic information  
364 corresponding to multi-causal vulnerability in fear and anxiety. As it was technically not yet feasible to  
365 implement combined EMG-fMRI measurements at the time of data acquisition, future studies profiting  
366 from this novel option<sup>73</sup> are warranted to investigate the neurobiological mechanisms underlying the  
367 specific association between IU and FPS. Our results clearly highlight the value of multimodal work  
368 and multivariate analyses tools and suggest that ‘compound profiles’ that integrate multiple input and  
369 outcome measures and hence potentially capture multiple causal processes may prove useful from a  
370 ‘personalized medicine’ perspective.

371           Taken together, it is fundamental to uncover factors, and particularly their interaction  
372 contributing to individual risk and resilience to pathological fear in order to develop individually tailored  
373 prevention and intervention programs (‘precision medicine’) in the future. As such, improved  
374 understanding of (neurobiological) mechanisms underlying individual differences in experimental fear  
375 learning can be expected to translate into improved understanding on how adaptive responding to threats  
376 turns into maladaptive fear responding<sup>74,75</sup>. It will thus be important to extend the investigation of  
377 individual differences and the underlying neurobiological mechanisms beyond experimental fear  
378 acquisition to tests focusing on the long-term retention of fear and extinction memory (i.e., return of  
379 fear<sup>69</sup>), and ultimately to clinical populations. We provide a first step towards this overarching aim and  
380 provide mechanistic insights of inter-individual differences in fear processing.

381 **Acknowledgements**

382 This work was funded by grants of the Deutsche Forschungsgemeinschaft (German Research  
383 Foundation) and the Collaborative Research Center (CRC 58 “Fear, Anxiety, Anxiety Disorders) grant  
384 to T.B.L (INST 211/633-1; DFG LO 1980/1-1).

385 **Conflict of interest**

386 The authors declare no conflict of interest.

387



388 **References**

- 389 1 Bonanno GA. Loss, trauma, and human resilience: have we underestimated the human capacity to  
390 thrive after extremely aversive events? *Am Psychol* 2004; **59**: 20–28.
- 391 2 Mineka S, Oehlberg K. The relevance of recent developments in classical conditioning to  
392 understanding the etiology and maintenance of anxiety disorders. *Acta Psychol (Amst)* 2008; **127**:  
393 567–580.
- 394 3 Lonsdorf TB, Merz CJ. More than just noise: Inter-individual differences in fear acquisition,  
395 extinction and return of fear in humans – biological, experiential, temperamental factors, and  
396 methodological pitfalls. *Neuroscience & Biobehavioral Reviews* 2017.  
397 doi:10.1016/j.neubiorev.2017.07.007.
- 398 4 Duits P, Cath DC, Lissek S, Hox JJ, Hamm AO, Engelhard IM *et al.* Updated Meta-Analysis of  
399 Classical Fear Conditioning in the Anxiety Disorders. *Depress Anxiety* 2015; : n/a-n/a.
- 400 5 Lissek S, Powers A, McClure E, Phelps E, Woldehawariat G, Grillon C *et al.* Classical fear  
401 conditioning in the anxiety disorders: a meta-analysis. *BEHAVIOUR RESEARCH AND THERAPY*  
402 2005; **43**: 1391–1424.
- 403 6 Scheveneels S, Boddez Y, Vervliet B, Hermans D. The validity of laboratory-based treatment  
404 research: Bridging the gap between fear extinction and exposure treatment. *Behav Res Ther* 2016;  
405 **86**: 87–94.
- 406 7 Forcadell E, Torrents-Rodas D, Vervliet B, Leiva D, Tortella-Feliu M, Fullana MA. Does fear  
407 extinction in the laboratory predict outcomes of exposure therapy? A treatment analog study.  
408 *International Journal of Psychophysiology* doi:10.1016/j.ijpsycho.2017.09.001.
- 409 8 Lueken U, Zierhut KC, Hahn T, Straube B, Kircher T, Reif A *et al.* Neurobiological markers  
410 predicting treatment response in anxiety disorders: A systematic review and implications for  
411 clinical application. *Neurosci Biobehav Rev* 2016; **66**: 143–162.
- 412 9 Craske MG, Stein MB, Eley TC, Milad MR, Holmes A, Rapee RM *et al.* Anxiety disorders.  
413 *Nature Reviews Disease Primers* 2017; **3**: nrdp201724.
- 414 10 Spielberger CD, Gorsuch RL, Lushene RE. *Manual for the State-Trait Anxiety Inventory*.  
415 Consulting Psychologists Press.: Palo Alto, CA, 1983.
- 416 11 Eysenck HJ. *Dimensions of Personality*. Transaction Publishers, 1950.
- 417 12 Buhr K, Dugas MJ. The intolerance of uncertainty scale: psychometric properties of the English  
418 version. *Behaviour Research and Therapy* 2002; **40**: 931–945.
- 419 13 Gerlach AL, Andor T, Patzelt J. Die Bedeutung von Unsicherheitsintoleranz für die Generalisierte  
420 Angststörung Modellüberlegungen und Entwicklung einer deutschen Version der  
421 Unsicherheitsintoleranz-Skala. *Zeitschrift für Klinische Psychologie und Psychotherapie* 2008;  
422 **37**: 190–199.
- 423 14 Chin B, Nelson BD, Jackson F, Hajcak G. Intolerance of uncertainty and startle potentiation in  
424 relation to different threat reinforcement rates. *Int J Psychophysiol* 2016; **99**: 79–84.

- 425 15 Dunsmoor JE, Campese VD, Ceceli AO, LeDoux JE, Phelps EA. Novelty-facilitated extinction:  
426 providing a novel outcome in place of an expected threat diminishes recovery of defensive  
427 responses. *Biol Psychiatry* 2015; **78**: 203–209.
- 428 16 Morriss J, Christakou A, van Reekum CM. Intolerance of uncertainty predicts fear extinction in  
429 amygdala-ventromedial prefrontal cortical circuitry. *Biol Mood Anxiety Disord* 2015; **5**.  
430 doi:10.1186/s13587-015-0019-8.
- 431 17 Morriss J, Christakou A, van Reekum CM. Nothing is safe: Intolerance of uncertainty is  
432 associated with compromised fear extinction learning. *Biol Psychol* 2016.  
433 doi:10.1016/j.biopsycho.2016.05.001.
- 434 18 Otto MW, Leyro TM, Christian K, Deveney CM, Reese H, Pollack MH *et al*. Prediction of ‘fear’  
435 acquisition in healthy control participants in a de novo fear-conditioning paradigm. *Behav Modif*  
436 2007; **31**: 32–51.
- 437 19 Altman DG, Royston P. The cost of dichotomising continuous variables. *BMJ* 2006; **332**: 1080.
- 438 20 Cohen J. The Cost of Dichotomization. *Applied Psychological Measurement* 1983; **7**: 249–253.
- 439 21 McClelland G, Irwin JR. Negative Consequences of Dichotomizing Continuous Predictor  
440 Variables. Social Science Research Network: Rochester, NY,  
441 2003<https://papers.ssrn.com/abstract=627741> (accessed 14 Oct2016).
- 442 22 Preacher KJ, Rucker DD, MacCallum RC, Nicewander WA. Use of the extreme groups approach:  
443 a critical reexamination and new recommendations. *Psychol Methods* 2005; **10**: 178–192.
- 444 23 Lonsdorf TB, Merz CJ. More than just noise: Inter-individual differences in fear acquisition,  
445 extinction and return of fear in humans – biological, experiential, temperamental factors, and  
446 methodological pitfalls. *Neuroscience & Biobehavioral Reviews*  
447 doi:10.1016/j.neubiorev.2017.07.007.
- 448 24 Lonsdorf TB, Menz MM, Andreatta M, Fullana MA, Golkar A, Haaker J *et al*. Don’t fear ‘fear  
449 conditioning’: Methodological considerations for the design and analysis of studies on human fear  
450 acquisition, extinction, and return of fear. *Neuroscience & Biobehavioral Reviews*  
451 doi:10.1016/j.neubiorev.2017.02.026.
- 452 25 Tzschoppe J, Nees F, Banaschewski T, Barker GJ, Büchel C, Conrod PJ *et al*. Aversive learning  
453 in adolescents: modulation by amygdala-prefrontal and amygdala-hippocampal connectivity and  
454 neuroticism. *Neuropsychopharmacology* 2014; **39**: 875–884.
- 455 26 Sehlmeier C, Dannlowski U, Schöning S, Kugel H, Pyka M, Pfliegerer B *et al*. Neural correlates  
456 of trait anxiety in fear extinction. *Psychol Med* 2011; **41**: 789–798.
- 457 27 Barrett J, Armony JL. Influence of trait anxiety on brain activity during the acquisition and  
458 extinction of aversive conditioning. *Psychol Med* 2009; **39**: 255–265.
- 459 28 Indovina I, Robbins TW, Núñez-Elizalde AO, Dunn BD, Bishop SJ. Fear-conditioning  
460 mechanisms associated with trait vulnerability to anxiety in humans. *Neuron* 2011; **69**: 563–571.

- 461 29 Sjouwerman R, Niehaus J, Lonsdorf TB. Contextual Change After Fear Acquisition Affects  
462 Conditioned Responding and the Time Course of Extinction Learning—Implications for Renewal  
463 Research. *Front Behav Neurosci* 2015; : 337.
- 464 30 Scharfenort R, Lonsdorf TB. Neural correlates of and processes underlying generalized and  
465 differential return of fear. *Social Cognitive and Affective Neuroscience* 2016; **11**: 612–620.
- 466 31 Sjouwerman R, Niehaus J, Kuhn M, Lonsdorf TB. Don't startle me—Interference of startle probe  
467 presentations and intermittent ratings with fear acquisition. *Psychophysiol* 2016; : n/a-n/a.
- 468 32 Scharfenort R, Menz M, Lonsdorf TB. Adversity-induced relapse of fear: neural mechanisms and  
469 implications for relapse prevention from a study on experimentally induced return-of-fear  
470 following fear conditioning and extinction. *Translational Psychiatry* 2016; **6**: e858.
- 471 33 Gerhard U, Borkenau, P. & Ostendorf, F. (1993). NEO-Fünf-Faktoren Inventar (NEO-FFI) nach  
472 Costa und McCrae. Göttingen: Hogrefe. Preis DM 84.-. *Zeitschrift für Klinische Psychologie und*  
473 *Psychotherapie* 1999; **28**: 145–146.
- 474 34 Boucsein W, Fowles DC, Grimnes S, Ben-Shakhar G, Roth WT, Dawson ME *et al.* Publication  
475 recommendations for electrodermal measurements. *Psychophysiology* 2012; **49**: 1017–1034.
- 476 35 Sehlmeier C, Schoning S, Zwitserlood P, Pfeleiderer B, Kircher T, Arolt V. Human fear  
477 conditioning and extinction in neuroimaging: a systematic review. *PLoS One* 2009; **4**: e5865.
- 478 36 Fullana MA, Harrison BJ, Soriano-Mas C, Vervliet B, Cardoner N, Àvila-Parcet A *et al.* Neural  
479 signatures of human fear conditioning: an updated and extended meta-analysis of fMRI studies.  
480 *Mol Psychiatry* 2015. doi:10.1038/mp.2015.88.
- 481 37 MacCallum RC, Browne MW, Sugawara HM. Power analysis and determination of sample size  
482 for covariance structure modeling. *Psychological Methods* 1996; **1**: 130–149.
- 483 38 M. W. Browne RC. Alternative ways of assessing model fit. *Sociological Methods &*  
484 *Research* 1992; **21**. doi:10.1177/0049124192021002005.
- 485 39 Tovote P, Fadok JP, Lüthi A. Neuronal circuits for fear and anxiety. *Nat Rev Neurosci* 2015; **16**:  
486 317–331.
- 487 40 Herry C, Johansen JP. Encoding of fear learning and memory in distributed neuronal circuits. *Nat*  
488 *Neurosci* 2014; **17**: 1644–1654.
- 489 41 Greco JA, Liberzon I. Neuroimaging of Fear-Associated Learning. *Neuropsychopharmacology*  
490 2016; **41**: 320–334.
- 491 42 LaBar KS, Gatenby JC, Gore JC, LeDoux JE, Phelps EA. Human amygdala activation during  
492 conditioned fear acquisition and extinction: a mixed-trial fMRI study. *Neuron* 1998; **20**: 937–945.
- 493 43 Büchel C, Morris J, Dolan RJ, Friston KJ. Brain systems mediating aversive conditioning: an  
494 event-related fMRI study. *Neuron* 1998; **20**: 947–957.
- 495 44 Weems CF, Pina AA, Costa NM, Watts SE, Taylor LK, Cannon MF. Predisaster trait anxiety and  
496 negative affect predict posttraumatic stress in youths after Hurricane Katrina.

- 497 *JCONSULTCLINPSYCHOL, JOURNAL OF CONSULTING & CLINICAL PSYCHOLOGY,*  
498 *Journal of consulting and clinical psychology, Journal of consulting and clinical psychology*  
499 2007; **75**: 154–159.
- 500 45 Reiss S. Trait anxiety: it's not what you think it is. *J Anxiety Disord* 1997; **11**: 201–214.
- 501 46 Bados A, Gómez-Benito J, Balaguer G. The state-trait anxiety inventory, trait version: does it  
502 really measure anxiety? *J Pers Assess* 2010; **92**: 560–567.
- 503 47 Bieling PJ, Antony MM, Swinson RP. The State-Trait Anxiety Inventory, Trait version: structure  
504 and content re-examined. *Behav Res Ther* 1998; **36**: 777–788.
- 505 48 Mathews A, Ridgeway V, Williamson DA. Evidence for attention to threatening stimuli in  
506 depression. *Behav Res Ther* 1996; **34**: 695–705.
- 507 49 Etkin A, Klemenhagen KC, Dudman JT, Rogan MT, Hen R, Kandel ER *et al.* Individual  
508 Differences in Trait Anxiety Predict the Response of the Basolateral Amygdala to Unconsciously  
509 Processed Fearful Faces. *Neuron* 2004; **44**: 1043–1055.
- 510 50 MacNamara A, Rabinak CA, Fitzgerald DA, Zhou XJ, Shankman SA, Milad MR *et al.* Neural  
511 correlates of individual differences in fear learning. *Behav Brain Res* 2015; **287**: 34–41.
- 512 51 Furmark T, Fischer H, Wik G, Larsson M, Fredrikson M. The amygdala and individual  
513 differences in human fear conditioning. *Neuroreport* 1997; **8**: 3957–3960.
- 514 52 MacKinnon DP, Krull JL, Lockwood CM. Equivalence of the Mediation, Confounding and  
515 Suppression Effect. *Prev Sci* 2000; **1**: 173.
- 516 53 Beckers T, Krypotos A-M, Boddez Y, Effting M, Kindt M. What's wrong with fear conditioning?  
517 *Biological Psychology* 2013; **92**: 90–96.
- 518 54 Stevens JS, Kim YJ, Galatzer-Levy IR, Reddy R, Ely TD, Nemeroff CB *et al.* Amygdala  
519 Reactivity and Anterior Cingulate Habituation Predict Posttraumatic Stress Disorder Symptom  
520 Maintenance After Acute Civilian Trauma. *Biol Psychiatry* 2016.  
521 doi:10.1016/j.biopsych.2016.11.015.
- 522 55 Lissek S, Pine DS, Grillon C. The strong situation: a potential impediment to studying the  
523 psychobiology and pharmacology of anxiety disorders. *Biol Psychol* 2006; **72**: 265–270.
- 524 56 Haddad ADM, Pritchett D, Lissek S, Lau JYF. Trait anxiety and fear responses to safety cues:  
525 Stimulus generalization or sensitization? *Journal of Psychopathology and Behavioral Assessment*  
526 2012; **34**: 323–331.
- 527 57 Gazendam FJ, Kamphuis JH, Kindt M. Deficient safety learning characterizes high trait anxious  
528 individuals. *Biological psychology* 2013; **92**: 342–52.
- 529 58 Kindt M, Soeter M. Fear inhibition in high trait anxiety. *PloS one* 2014; **9**: e86462.
- 530 59 Haaker J, Lonsdorf TB, Schümann D, Menz M, Brassens S, Bunzeck N *et al.* Deficient inhibitory  
531 processing in trait anxiety: Evidence from context-dependent fear learning, extinction recall and  
532 renewal. *Biological Psychology* 2015. doi:10.1016/j.biopsycho.2015.07.010.

- 533 60 Zhang L, Wang K, Zhu C, Yu F, Chen X. Trait Anxiety Has Effect on Decision Making under  
534 Ambiguity but Not Decision Making under Risk. *PLoS One* 2015; **10**.  
535 doi:10.1371/journal.pone.0127189.
- 536 61 Cuthbert BN, Insel TR. Toward the future of psychiatric diagnosis: the seven pillars of RDoC.  
537 *BMC Med* 2013; **11**: 126.
- 538 62 Antony MM, Orsillo SM, Roemer L (eds.). *Practitioner's Guide to Empirically Based Measures*  
539 *of Anxiety*. 2001 edition. Springer: New York, 2001.
- 540 63 Marin M-F, Zsido RG, Song H, Lasko NB, Killgore WDS, Rauch SL *et al*. Skin Conductance  
541 Responses and Neural Activations During Fear Conditioning and Extinction Recall Across  
542 Anxiety Disorders. *JAMA Psychiatry* 2017. doi:10.1001/jamapsychiatry.2017.0329.
- 543 64 Hedge C, Powell G, Sumner P. The reliability paradox: Why robust cognitive tasks do not  
544 produce reliable individual differences. *Behav Res* 2017; : 1–21.
- 545 65 Arnaudova I, Kryptos A-M, Effting M, Boddez Y, Kindt M, Beckers T. Individual Differences  
546 in Discriminatory Fear Learning under Conditions of Ambiguity: A Vulnerability Factor for  
547 Anxiety Disorders? *Front Psychol* 2013; **4**: 298.
- 548 66 Joos E, Vansteenwegen D, Hermans D. Worry as a predictor of fear acquisition in a nonclinical  
549 sample. *Behav Modif* 2012; **36**: 723–750.
- 550 67 Martínez KG, Castro-Couch M, Franco-Chaves JA, Ojeda-Arce B, Segura G, Milad MR *et al*.  
551 Correlations between psychological tests and physiological responses during fear conditioning and  
552 renewal. *Biology of Mood & Anxiety Disorders* 2012; **2**: 16.
- 553 68 Morriss J, Macdonald B, van Reekum CM. What Is Going On Around Here? Intolerance of  
554 Uncertainty Predicts Threat Generalization. *PLoS ONE* 2016; **11**: e0154494.
- 555 69 Sehlmeier C, Dannlowski U, Schöning S, Kugel H, Pyka M, Pfleiderer B *et al*. Neural correlates  
556 of trait anxiety in fear extinction. *Psychological medicine* 2011; **41**: 789–798.
- 557 70 Torrents-Rodas D, Fullana MA, Bonillo A, Caseras X, Andión O, Torrubia R. No effect of trait  
558 anxiety on differential fear conditioning or fear generalization. *Biol Psychol* 2013; **92**: 185–190.
- 559 71 Lindner K, Neubert J, Pfanmöller J, Lotze M, Hamm AO, Wendt J. Fear-potentiated startle  
560 processing in humans: Parallel fMRI and orbicularis EMG assessment during cue conditioning  
561 and extinction. *Int J Psychophysiol* 2015. doi:10.1016/j.ijpsycho.2015.02.025.
- 562 72 Jovanovic T, Ressler KJ. How the neurocircuitry and genetics of fear inhibition may inform our  
563 understanding of PTSD. *Am J Psychiatry* 2010; **167**: 648–662.
- 564 73 Ressler KJ, Mayberg HS. Targeting abnormal neural circuits in mood and anxiety disorders: from  
565 the laboratory to the clinic. *Nat Neurosci* 2007; **10**: 1116–1124.
- 566 74 Antony MM, Orsillo SM, Roemer L. *Practitioner's guide to empirically based measures of*  
567 *anxiety*. 2001 doi:10.1007/b108176.

568 **Supplementary information**

569 Supplementary information is provided as a separate file.
